# Supplementary material for: An in situ SERS study of substrate-dependent surface plasmon induced aromatic nitration
Source: Royal Society of Chemistry journal article supplement (doi:10.1039/c5tc00835b), 2015-01-01
Supplement: c5tc00835b1.pdf [file c5tc00835b1.pdf]

## Electronic Supplemental Information

### **In situ SERS study of surface plasmon induced nitration on Ag@Polydopamine@Au structure**

Wei Huang,<sup>a§</sup> Qiang Jing,<sup>a§</sup> Yunchen Du,<sup>\*a</sup> Bin Zhang,<sup>a</sup> Xiangli Meng,<sup>a</sup> Mengtao Sun,<sup>b</sup>  
Kirk S. Schanze,<sup>c</sup> Hong Gao,<sup>d</sup> and Ping Xu<sup>\*a</sup>

<sup>a</sup> Department of Chemistry, Harbin Institute of Technology, Harbin 150001, China. Email:  
pxu@hit.edu.cn

<sup>b</sup> Institute of Physics, Chinese Academy of Sciences, Beijing 100090, China.

<sup>c</sup> Department of Chemistry, University of Florida, Gainesville, FL 32611, USA.

<sup>d</sup> Key Laboratory for Photonic and Electric Bandgap Materials, Ministry of Education, Harbin  
Normal University, Harbin 150025, China

§ These two authors contributed equally to this work.

## ADDITIONAL FIGURES

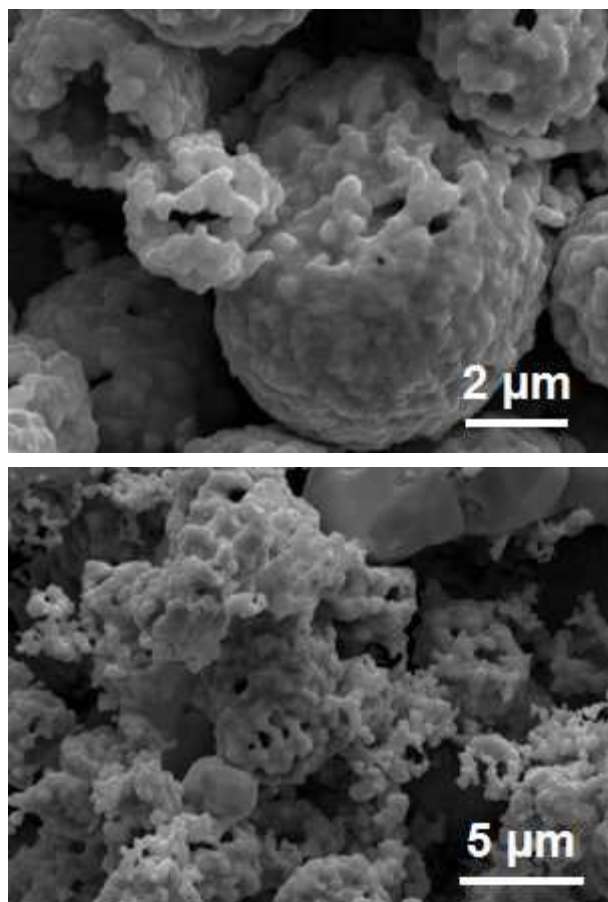

**Fig. S1.** SEM images of the Ag particles after direct reacting with  $\text{HAuCl}_4$  for 10 min (up) and 30 min (down).

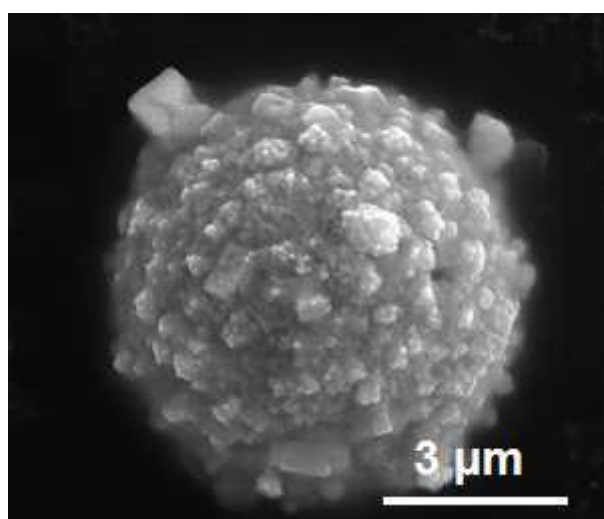

**Fig. S2.** SEM image of the Ag@PDA particles after reacting with  $\text{HAuCl}_4$ , before washing with ammonia solution.

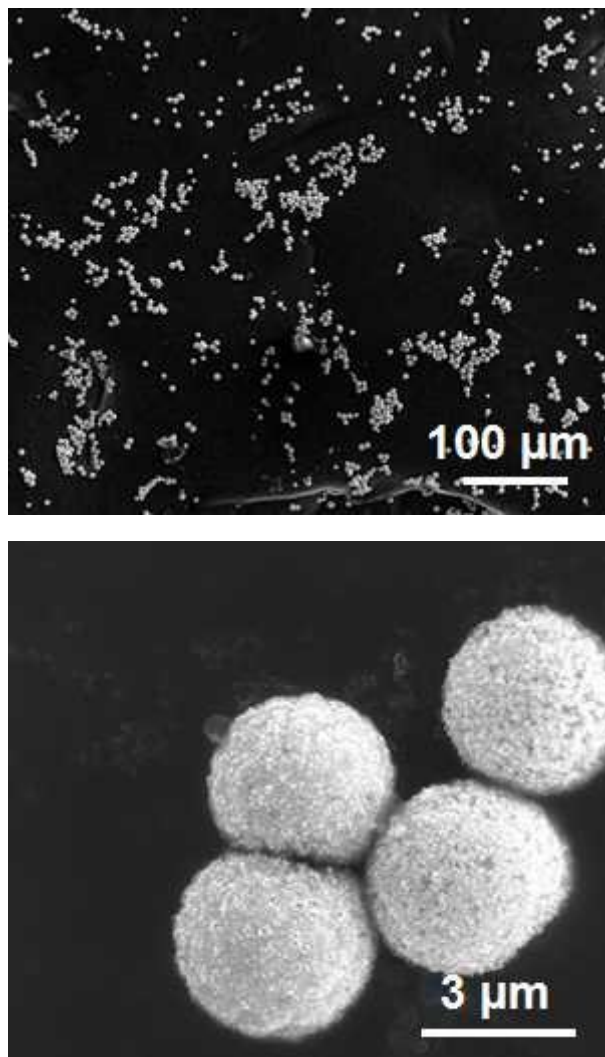

**Fig. S3.** SEM images of the as-prepared Ag@PDA@Au particles under different magnifications. These particles can be easily dispersed evenly on substrates, making the single particle SERS technique possible.

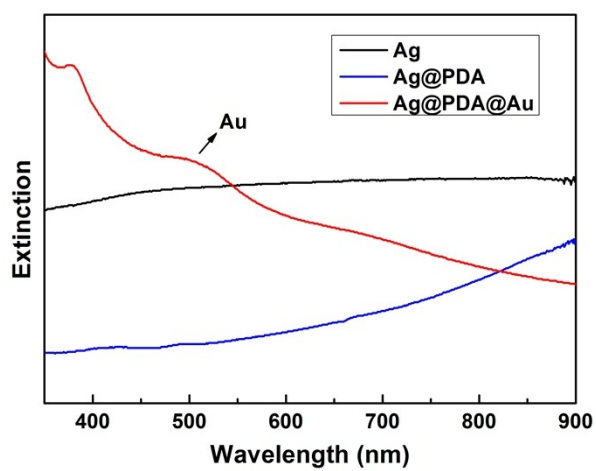

**Fig. S4.** Extinction spectra of Ag, Ag@PDA, and Ag@PDA@Au particles. The peak located around 510 nm indicates the successful decoration of 10-20 nm Au nanoparticles.

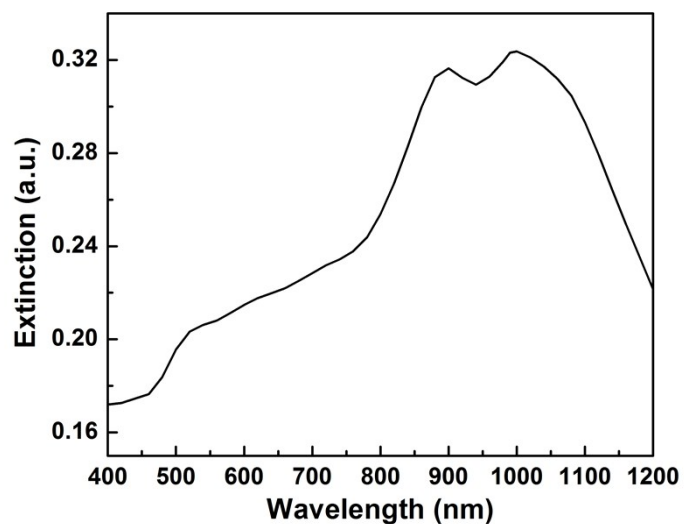

Fig. S5. Extinction spectrum of meatball-like Au particles in cyclohexane.

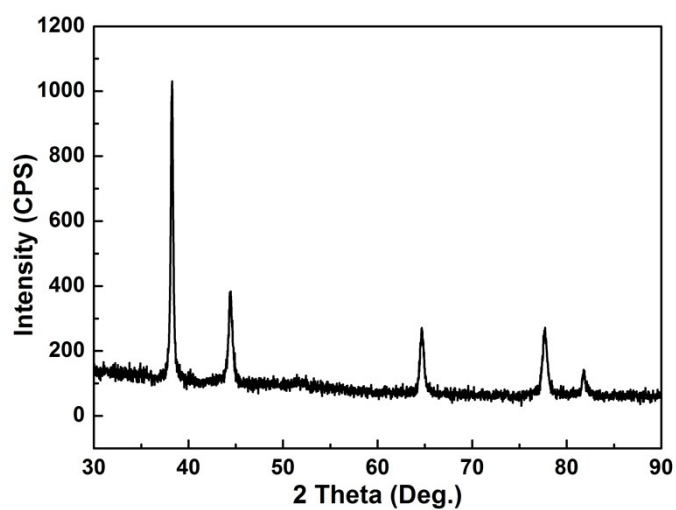

Fig. S6. XRD pattern of the as-prepared meatball-like Au particles.

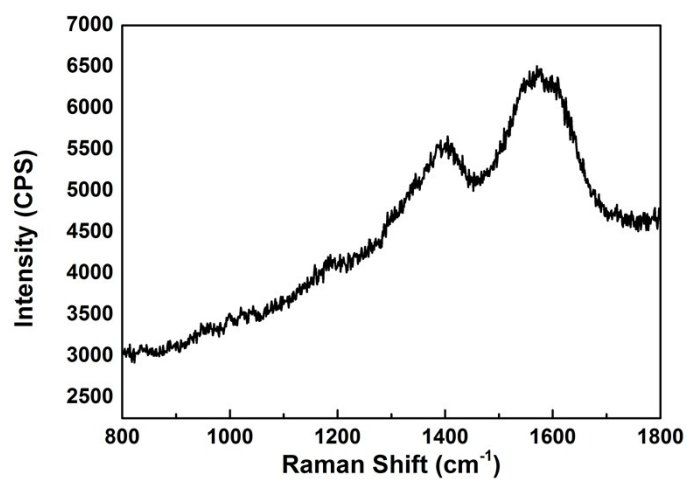

Fig. S7. SERS spectrum of  $10^{-8}$  M benzenethiol (BT) on the as-prepared Ag@PDA particles.

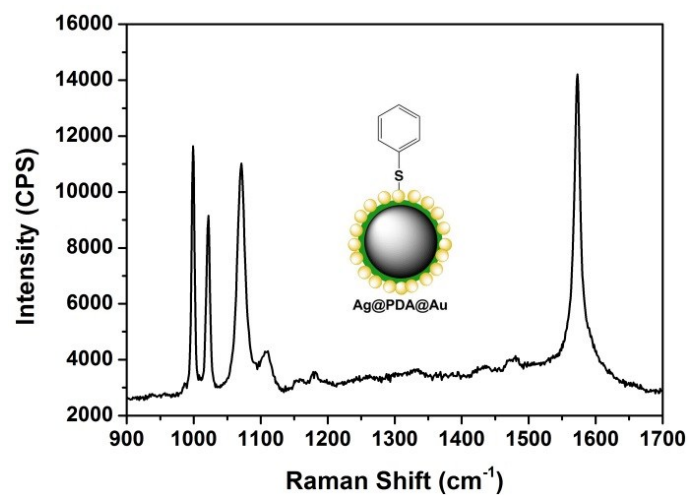

**Fig. S8.** SERS spectrum of  $10^{-8}$  M benzenethiol (BT) on the as-prepared Ag@PDA@Au particles.

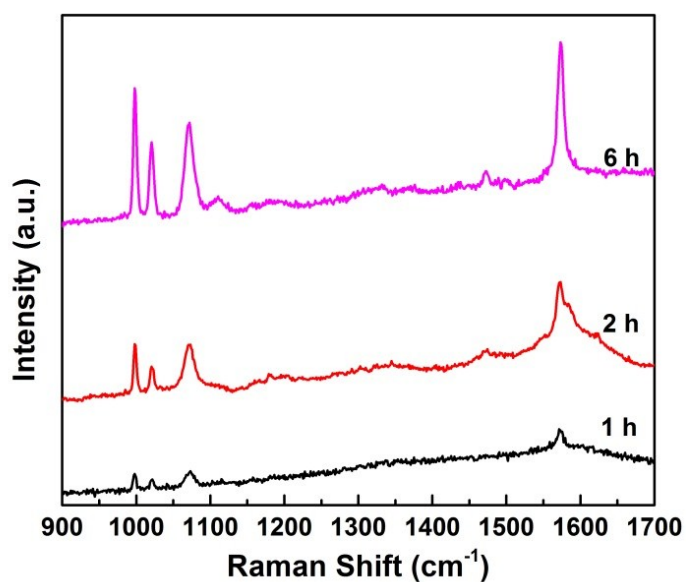

**Fig. S9.** SERS spectra of a mixture of benzenethiol (BT) and  $\text{HNO}_3$  on the Ag@PDA@Au particles in dark for different time periods. It can be seen that no nitration ( $-\text{NO}_2$  peak at  $1330\text{ cm}^{-1}$ ) happened in the dark environment.

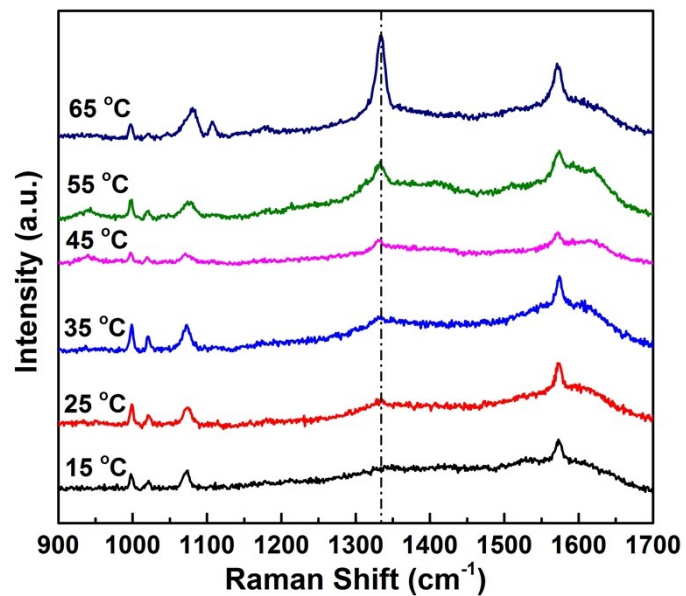

**Fig. S10.** SERS spectra obtained by heating a mixture of benzenethiol (BT) and HNO<sub>3</sub> with the presence of Ag@PDA@Au particles at different temperatures for 10 min.

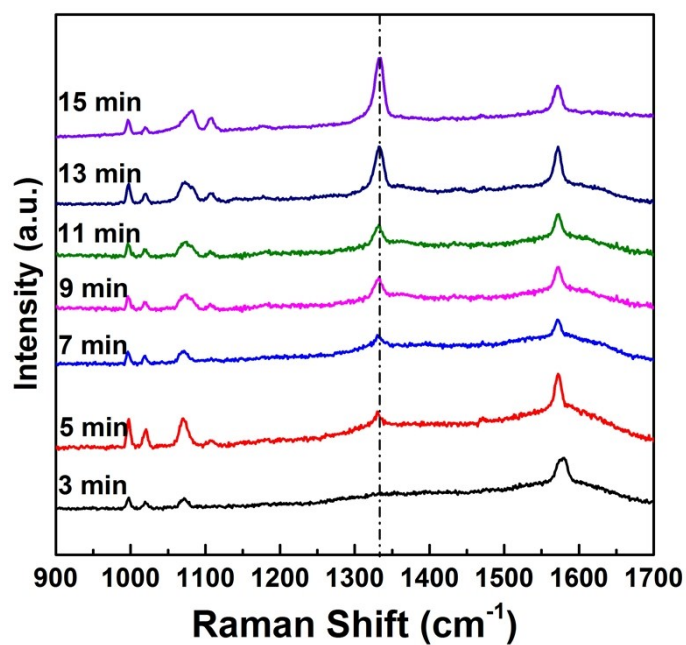

**Fig. S11.** SERS spectra obtained by heating a mixture of benzenethiol (BT) and HNO<sub>3</sub> with the presence of Ag@PDA@Au particles at 65 °C for different time periods.

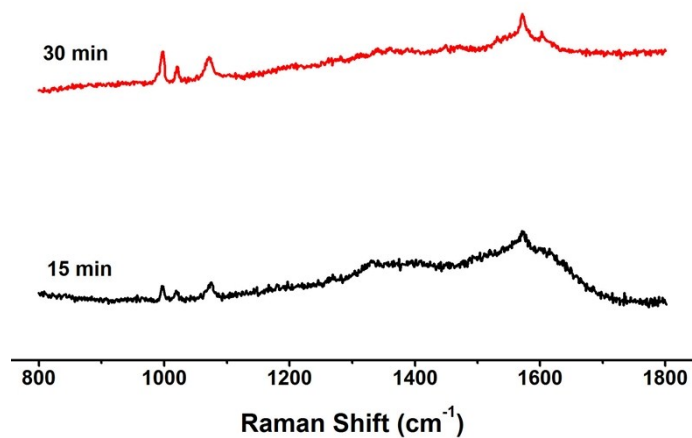

**Fig. S12.** SERS spectra obtained by heating a mixture of benzenethiol (BT) and HNO<sub>3</sub> without the presence of Ag@PDA@Au particles at 65 °C for different time periods.

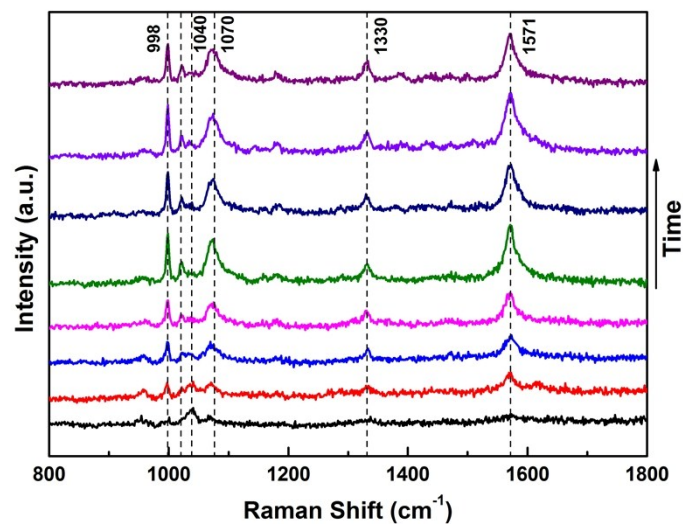

**Fig. S13.** Time-dependent SERS spectra showing the reaction of benzenethiol and nitric acid on a single Au hierarchical particle, with a laser wavelength of 633 nm and power of 54  $\mu$ W. Spectra were recorded every 2 min under continuous laser irradiation.

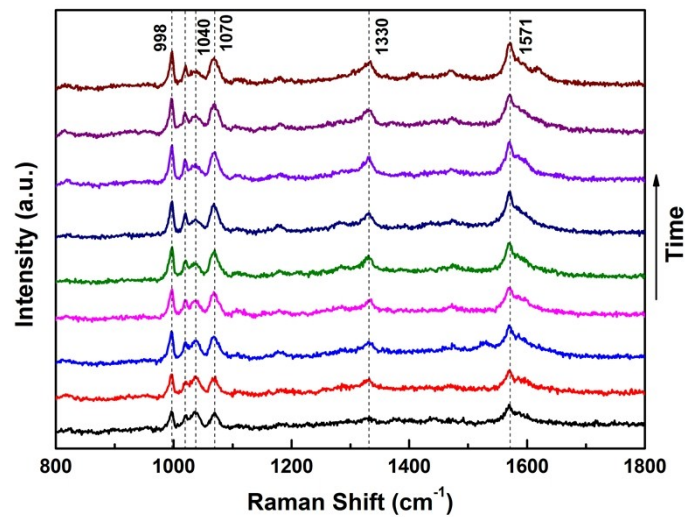

**Fig. S14.** Time-dependent SERS spectra showing the reaction of benzenethiol and nitric acid on a single Ag hierarchical particle, with a laser wavelength of 633 nm and power of 54  $\mu$ W. Spectra were recorded every 5 min under continuous laser irradiation.
